# Supplementary material
Source: PubMed Central journal article supplement (PMC8290943)
Supplement: nwaa243_supplemental_file.pdf [file nwaa243_supplemental_file.pdf]

# Supplementary Data to "Comparing the Containment Measures among Nations by the Epidemiological Effects of COVID-19"

Jia Gu,<sup>1</sup> Han Yan,<sup>2</sup> Yaxuan Huang,<sup>3</sup> Yuru Zhu,<sup>1</sup> Haoxuan Sun,<sup>4</sup>  
Yumou Qiu,<sup>5\*</sup> Song Xi Chen<sup>61\*</sup>

- <sup>1</sup>Center for Statistical Science, Peking University
- <sup>2</sup>School of Mathematical Sciences, Sichuan University
- <sup>3</sup>Yuanpei College, Peking University
- <sup>4</sup>Center for Data Science, Peking University
- <sup>5</sup>Department of Statistics, Iowa State University
- <sup>6</sup>Guanghua School of Management, Peking University

\*To whom correspondence should be addressed S. X. Chen at [csx@gsm.pku.edu.cn](mailto:csx@gsm.pku.edu.cn) and Y. Qiu at [yumouqiu@iastate.edu](mailto:yumouqiu@iastate.edu)

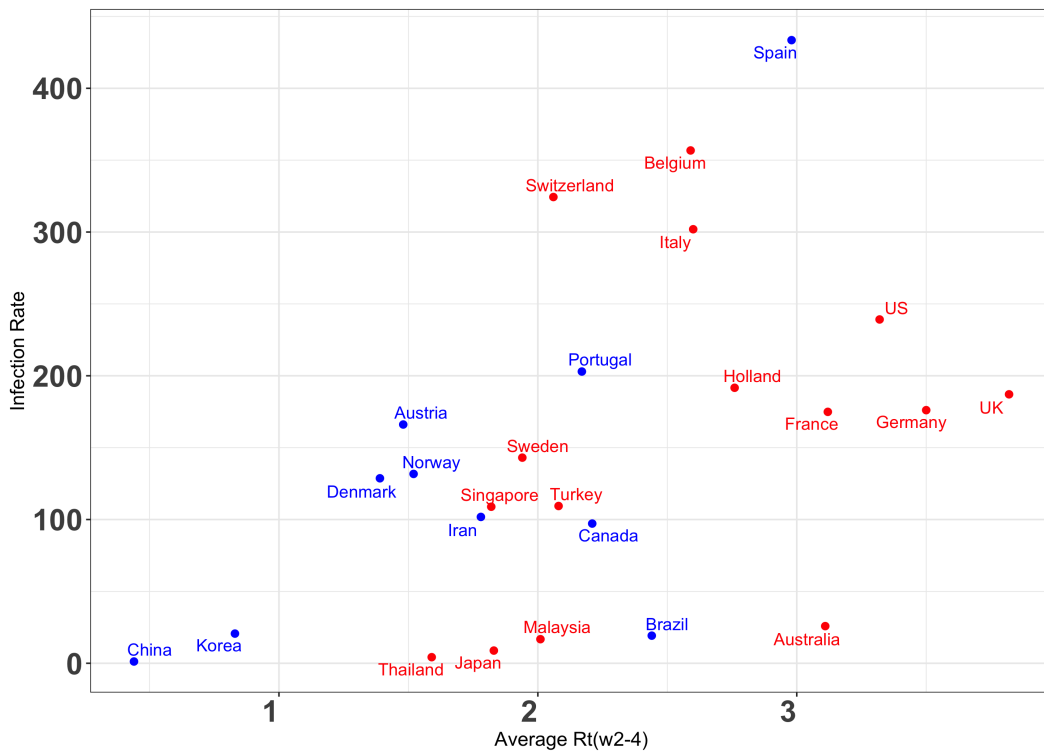

Figure S1: Scatter plot of positive cases per 100,000 population (till April 20th, 2020) versus the estimated average reproduction number  $R_t$  in Weeks 2-4 since the start date of community transmission among the 25 countries with the quick action countries in blue and slow action countries in red. The correlation was 0.48 with p-value 0.008 for the one-sided alternative against the null hypothesis of zero correlation.

Table S1: Key dates for taking COVID-19 control measures for the 25 countries and  $R_0$  (the 95% confidence interval). DCT: start date of community transmission. When a country's control measures are phasing in over a time window, we provide the first and the last dates; otherwise, the first date is the date of action.

|    | Country                      | DCT   | $R_0$ (95% CI)   | Response time | Control measures |           |
|----|------------------------------|-------|------------------|---------------|------------------|-----------|
|    |                              |       |                  |               | First date       | Last date |
| 1  | Australia <sup>3,4</sup>     | 02-26 | 4.83(3.75-8.54)  | 30.5          | 03-25            | 03-30     |
| 2  | Austria <sup>2,3,4</sup>     | 03-07 | 3.68(1.58-4.85)  | 6             | 03-10            | 03-16     |
| 3  | Belgium <sup>2,3,5</sup>     | 03-04 | 4.95(2.55-6.68)  | 14            | 03-18            |           |
| 4  | Brazil <sup>1,3,7</sup>      | 03-10 | 5.65(4.32-6.91)  | 10.5          | 03-18            | 03-28     |
| 5  | Canada <sup>1,2,3,4,5</sup>  | 03-07 | 3.62(2.10-4.60)  | 12.5          | 03-17            | 03-22     |
| 6  | China <sup>1,2,3,4,5,6</sup> | 01-23 | 4.78(3.15-6.57)  | 2             | 01-25            |           |
| 7  | Denmark <sup>1,2,3,4</sup>   | 03-03 | 6.26(4.98-7.94)  | 11.5          | 03-11            | 03-18     |
| 8  | France <sup>1,2,3,4</sup>    | 02-25 | 7.03(3.46-13.92) | 20            | 03-13            | 03-19     |
| 9  | Germany <sup>2,3,4,5</sup>   | 02-25 | 6.43(3.15-11.52) | 20            | 03-10            | 03-22     |
| 10 | Holland <sup>1,2,3,4,5</sup> | 02-29 | 6.74(2.97-28.57) | 17            | 03-12            | 03-22     |
| 11 | Iran <sup>2,4,5</sup>        | 02-22 | 8.62(2.92-20.24) | 10            | 02-28            | 03-07     |
| 12 | Italy <sup>2,3,6</sup>       | 02-23 | 6.25(4.69-8.52)  | 19.5          | 03-04            | 03-23     |
| 13 | Japan <sup>1,2,3</sup>       | 02-12 | 4.83(2.74-9.62)  | 19            | 03-02            |           |
| 14 | Korea <sup>2,4,5,6</sup>     | 02-17 | 5.56(3.93-7.23)  | 8             | 02-25            |           |
| 15 | Malaysia <sup>2,3,4,5</sup>  | 02-29 | 4.46(4.05-8.52)  | 18            | 03-18            |           |
| 16 | Norway <sup>2,3,4</sup>      | 03-03 | 5.21(5.03-5.38)  | 9             | 03-12            |           |
| 17 | Portugal <sup>1,2,3</sup>    | 03-07 | 5.93(4.99-10.30) | 9.5           | 03-15            | 03-18     |
| 18 | Singapore <sup>2,3,4</sup>   | 03-04 | 2.48(1.45-3.81)  | 30            | 04-03            |           |
| 19 | Spain <sup>1,2,3,4</sup>     | 02-29 | 6.75(4.52-8.73)  | 11.5          | 03-09            | 03-14     |
| 20 | Sweden <sup>3,4</sup>        | 03-01 | 6.02(5.23-6.65)  | 26            | 03-27            |           |
| 21 | Switzerland <sup>2,3,4</sup> | 03-01 | 3.64(2.30-4.64)  | 15.5          | 03-13            | 03-20     |
| 22 | Thailand <sup>1,3,7</sup>    | 03-07 | 4.57(1.44-6.40)  | 23            | 03-26            | 04-07     |
| 23 | Turkey <sup>6,7</sup>        | 03-18 | 5.54(4.93-6.02)  | 19.5          | 04-03            | 04-10     |
| 24 | UK <sup>2,3,4</sup>          | 02-25 | 7.03(2.06-14.29) | 24.5          | 03-18            | 03-23     |
| 25 | US <sup>1,2,3,5</sup>        | 02-29 | 4.10(3.15-4.76)  | 13            | 03-13            |           |
|    | Ave(SE)                      |       | 5.40(0.27)       | 16(1.46)      |                  |           |

<sup>1</sup> State of Emergency; <sup>2</sup> School suspension or closure; <sup>3</sup> Closure of public space or offices;

<sup>4</sup> Restriction on gathering; <sup>5</sup> Asking people to stay at home; <sup>6</sup> Locking down cities; <sup>7</sup> Imposition of a curfew;

## Comparison of Control Measures

Six control measures have been taken into consideration by the 25 countries: Locking down cities, school suspension or closure, closure of public space or offices, restriction on gathering, asking people to stay at home, imposition of a curfew. We included the four countries which have implemented the lock-down policy (China, Korea, Italy, Turkey) together with another four countries (Germany, Malaysia, Holland, Canada) which have implemented at least four actions among a pool of the control measures as the High-Level control group. We did not consider the national emergency as a measure as it needs specific policy measures to back up. The other countries are classified as the Usual-Level control group. Table S2 reports the differences in the weekly  $R_t$  reduction rates from Week 1's average  $R_t$  to Weeks 2–4 between the two groups. Although the neat reduction rates were positive, they were not significantly away from zero statistically at 5%. We have also experimented finer division of the usual group to medium and low action groups. The results were also not significant.

|             | High-Usual  |
|-------------|-------------|
| Week1-Week2 | 0.010(0.46) |
| Week1-Week3 | 0.092(0.15) |
| Week1-Week4 | 0.102(0.08) |

Table S2: Differences of mean decline rates of effective reproduction number  $R_t$  between the High-Level control countries and the Usual-Level control countries. P-values of one-sided t-test are reported in the parentheses with alternative hypothesis being true difference is greater than 0. High-Level control: China, Korea, Italy, Turkey, Germany, Malaysia, Holland, Canada; Usual-Level control: the other 17 countries.
